# Supplementary material for: Intake of the different types of dairy products, genetic predisposition, and the risks of nonalcoholic fatty liver disease and cirrhosis: a prospective cohort study
Source: Royal Society of Chemistry journal article supplement (doi:10.1039/d3fo04602h), 2024-01-01
Supplement: d3fo04602h1.pdf [file d3fo04602h1.pdf]

**Figure S1.** Directed acyclic graph (DAG) derived from literature and expert knowledge. Nodes represent variables and arrows represent causal associations. The exposure is different types of dairy products intake and the outcome is non-alcoholic fatty liver disease or cirrhosis. BMI, body mass index; NAFLD, non-alcoholic fatty liver disease; SES, socioeconomic status (including education level and Townsend deprivation index).

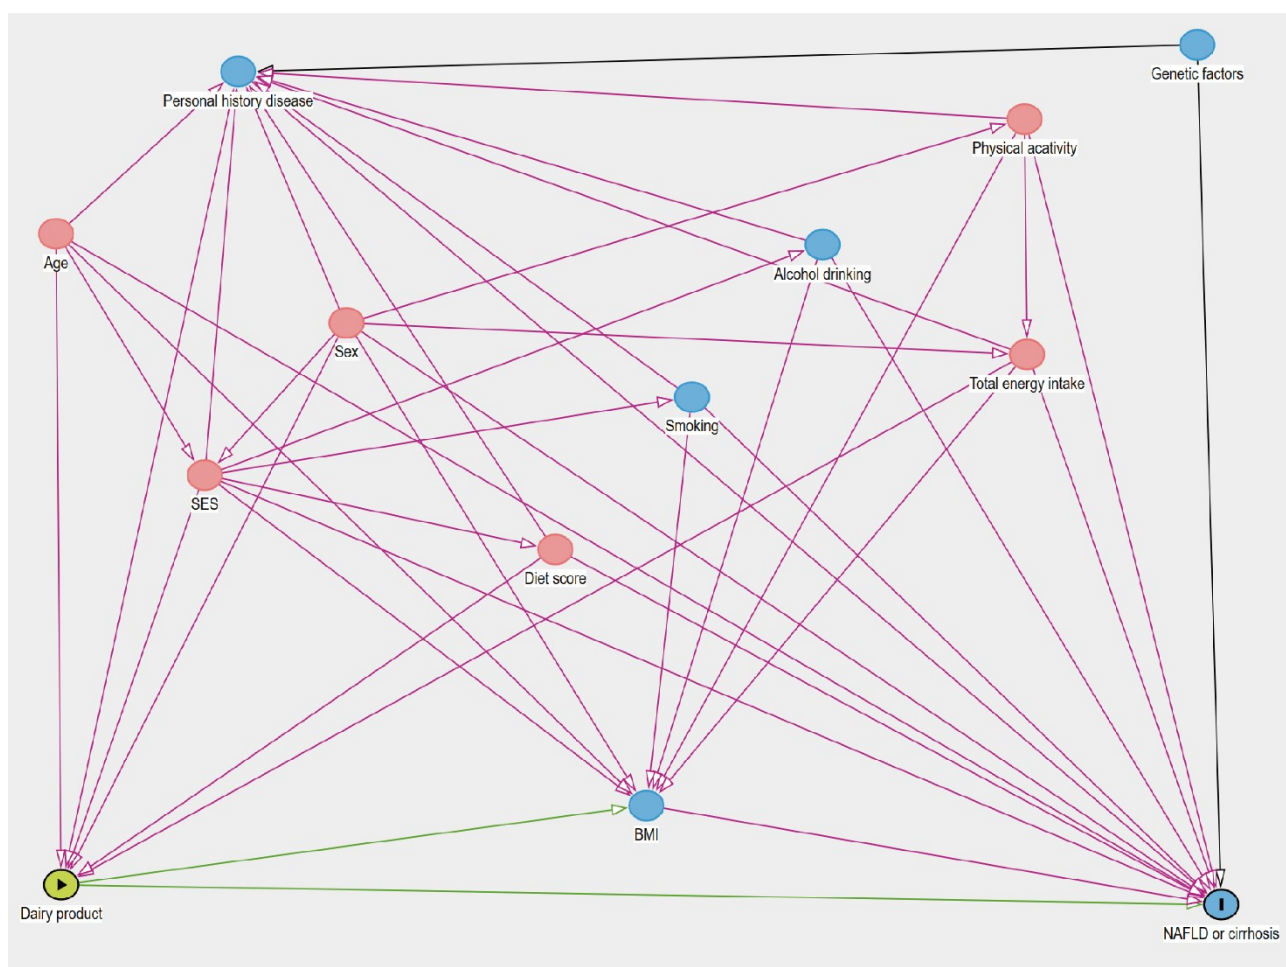

**Table S1. Classification and the fat content of dairy products.**

| Dairy type              | includes and fat content                                                                                            | Total dairy products | High-fat dairy products | Low-fat dairy products | Unfermented dairy products | Fermented dairy products |
|-------------------------|---------------------------------------------------------------------------------------------------------------------|----------------------|-------------------------|------------------------|----------------------------|--------------------------|
| Whole milk              | Whole milk >3.6 g fat per 100 g (cow, goat, sheep)                                                                  | ✓                    | ✓                       |                        | ✓                          |                          |
| Semi-skimmed milk       | Semi-skimmed milk >1 g fat per 100 g (cow, other)                                                                   | ✓                    |                         | ✓                      | ✓                          |                          |
| Skimmed milk            | Skimmed milk <1 g fat per 100 g (cow, cholesterol lowering, powdered)                                               | ✓                    |                         | ✓                      | ✓                          |                          |
| Full fat yogurt         | Whole milk yogurt (plain)                                                                                           | ✓                    | ✓                       |                        |                            | ✓                        |
| Low fat yogurt          | Fat free and lower fat yogurt, plain or flavored                                                                    | ✓                    |                         | ✓                      |                            | ✓                        |
| High-fat cheese         | Cheese >17.5 g fat per 100 g, including hard cheese, soft cheese, spreadable, Blue, Feta, Mozzarella, Goats, other) | ✓                    | ✓                       |                        |                            | ✓                        |
| Medium & low-fat cheese | Cheese ≤17.5g fat per 100 g, including hard and spreadable lower fat cheese, Cottage                                | ✓                    |                         | ✓                      |                            | ✓                        |

**Table S2. Definitions of NAFLD and other liver diseases**

|                                   | ICD-9                                                                                                           | ICD-10                                                                                                   |
|-----------------------------------|-----------------------------------------------------------------------------------------------------------------|----------------------------------------------------------------------------------------------------------|
| Nonalcoholic fatty liver disease  | 5718                                                                                                            | K760                                                                                                     |
| Nonalcoholic steato hepatitis     |                                                                                                                 | K758                                                                                                     |
| Alcohol related liver disease     | 571, 5710, 5711, 5712, 5713                                                                                     | K70                                                                                                      |
| Viral hepatitis                   | 70                                                                                                              | B16, B17, B18, B19                                                                                       |
| Autoimmune liver disease          | 5716, 5761                                                                                                      | K830, K743, K754                                                                                         |
| Cirrhosis                         | 27103, 4562, 5712, 5715, 57150,<br>57151, 57152, 57158, 57159, 5716                                             | I850, I859, K703, K704, K717, K721, K744, K745,<br>K746, K766, K767                                      |
| Other liver diseases <sup>a</sup> | 2750, 2751, 2776, 4530, 5714,<br>5716, 5715, 4561, 54621, 4560,<br>45620, 7895, 5722, 5724, 5723,<br>1550, 152, | E831, E830, E880, I820, K765, K739, K732, K744,<br>K745, C220, C229                                      |
| Alcohol/drug use disorder         | 303, 3050, 291, 3575, 4255, 5353,<br>9801, 9809, 3051, 3052, 3053,<br>3054, 3055, 3056, 3057, 3058,<br>3059     | F10, E244, G621, I426, K292, G312, G721, K852,<br>K860, T510, T519, F11, F12, F13, F14, F16, F18,<br>F19 |

<sup>a</sup> Other liver diseases including liver diseases as well as liver cancer mentioned in ICD-9 and ICD-10 coding.

**Table S3. SNPs used for creating the NAFLD-GRS**

| Gene Locus      | Chr | SNP        | Risk allele | Reference allele | Beta  |
|-----------------|-----|------------|-------------|------------------|-------|
| <i>PNPLA3</i>   | 22  | rs738409   | G           | C                | 0.594 |
| <i>TM6SF2</i>   | 19  | rs58542926 | T           | C                | 0.166 |
| <i>MBOAT7</i>   | 19  | rs641738   | T           | C                | 0.073 |
| <i>GCKR</i>     | 2   | rs1260326  | T           | C                | 0.271 |
| <i>HSD17B13</i> | 4   | rs72613567 | T           | TA               | 0.216 |

Abbreviations: Chr, chromosome; GRS, genetic risk score; SNP, single nucleotide polymorphism.

**Table S4. SNPs used for creating the cirrhosis-GRS**

| Gene Locus              | Chr | SNP        | Risk allele | Reference allele | Beta  |
|-------------------------|-----|------------|-------------|------------------|-------|
| <i>in or near MARC1</i> | 1   | rs2642438  | T           | A                | 0.139 |
| <i>HSD17B13</i>         | 4   | rs72613567 | T           | TA               | 0.301 |
| <i>TM6SF2</i>           | 19  | rs58542926 | T           | C                | 0.495 |
| <i>PNPLA3</i>           | 22  | rs738409   | G           | C                | 0.718 |
| <i>HFE</i>              | 6   | rs1800562  | A           | G                | 0.307 |
| <i>SERPINA</i>          | 14  | rs28929474 | T           | C                | 1.095 |

Abbreviations: Chr, chromosome; GRS, genetic risk score; SNP, single nucleotide polymorphism.

**Table S5. Association between NAFLD-GRS and risk of NAFLD <sup>a</sup>**

|                        | $\leq$ median NAFLD-GRS | $>$ median NAFLD-GRS | per SD increment of NAFLD-GRS |
|------------------------|-------------------------|----------------------|-------------------------------|
| Median (min, max)      | 0.56 (0.00, 0.81)       | 1.15 (0.81, 2.64)    |                               |
| Number of participants | 96,637                  | 93,508               |                               |
| Number of cases        | 636                     | 876                  |                               |
| PYs                    | 1,112,693               | 1,076,951            |                               |
| Model 1                | 1.00 (reference)        | 1.43 (1.29, 1.58)    | 1.24 (1.18, 1.30)             |
| Model 2                | 1.00 (reference)        | 1.45 (1.31, 1.60)    | 1.25 (1.20, 1.32)             |
| Model 3                | 1.00 (reference)        | 1.45 (1.31, 1.60)    | 1.25 (1.19, 1.31)             |

Abbreviations: BMI, body mass index; NAFLD-GRS, NAFLD genetic risk score; PYs, person-years.

<sup>a</sup> Hazard ratios (95% confidence interval) (all such values).

Model 1 was crude model.

Model 2 was adjusted for age, sex, and BMI.

Model 3 was additionally adjusted for total energy intake, diet score, smoking status, alcohol intake, educational level, Townsend deprivation index, physical activity, hypertension, diabetes, cancer, cardiovascular disease, first 10 principal components of ancestry, and genotype measurement batch.

**Table S6. Association between cirrhosis-GRS and risk of cirrhosis <sup>a</sup>**

|                        | ≤ median cirrhosis-GRS | > median cirrhosis-GRS | per SD increment of cirrhosis-GRS |
|------------------------|------------------------|------------------------|-----------------------------------|
| Median (min, max)      | 0.74 (0.00, 1.00)      | 1.46 (1.00, 4.56)      |                                   |
| Number of participants | 96,407                 | 93,738                 |                                   |
| Number of cases        | 232                    | 324                    |                                   |
| PYs                    | 1,109,820              | 1,079,824              |                                   |
| Model 1                | 1.00 (reference)       | 1.44 (1.21, 1.70)      | 1.36 (1.27, 1.47)                 |
| Model 2                | 1.00 (reference)       | 1.45 (1.22, 1.71)      | 1.37 (1.28, 1.48)                 |
| Model 3                | 1.00 (reference)       | 1.47 (1.24, 1.74)      | 1.39 (1.29, 1.50)                 |

Abbreviations: BMI, body mass index; cirrhosis-GRS, cirrhosis genetic risk score; PYs, person-years.

<sup>a</sup> Hazard ratios (95% confidence interval) (all such values).

Model 1 was crude model.

Model 2 was adjusted for age, sex, and BMI.

Model 3 was additionally adjusted for total energy intake, diet score, smoking status, alcohol intake, educational level, Townsend deprivation index, physical activity, hypertension, diabetes, cancer, cardiovascular disease, first 10 principal components of ancestry, and genotype measurement batch.

**Table S7. Association between dairy consumption and risk of NAFLD according to NAFLD-GRS in the UK Biobank Cohort <sup>a</sup>**

|                                   | Quartiles of dairy consumption |                      |                      |                      | <i>P</i> for trend<br><sup>b</sup> | <i>P</i> for<br>interaction <sup>b</sup> |
|-----------------------------------|--------------------------------|----------------------|----------------------|----------------------|------------------------------------|------------------------------------------|
|                                   | Quartile 1                     | Quartile 2           | Quartile 3           | Quartile 4           |                                    |                                          |
| <b>Total dairy products</b>       |                                |                      |                      |                      |                                    | 0.58                                     |
| ≤ median NAFLD-GRS                | 1.00<br>(reference)            | 0.95 (0.76,<br>1.18) | 1.07 (0.86,<br>1.32) | 0.94 (0.75,<br>1.19) | 0.89                               |                                          |
| > median NAFLD-GRS                | 1.00<br>(reference)            | 0.97 (0.81,<br>1.16) | 0.84 (0.70,<br>1.02) | 0.81 (0.67,<br>0.98) | 0.01                               |                                          |
| <b>High-fat dairy products</b>    |                                |                      |                      |                      |                                    | 0.56                                     |
| ≤ median NAFLD-GRS                | 1.00<br>(reference)            | 0.81 (0.62,<br>1.05) | 0.85 (0.69,<br>1.06) | 0.88 (0.72,<br>1.08) | 0.14                               |                                          |
| > median NAFLD-GRS                | 1.00<br>(reference)            | 1.07 (0.87,<br>1.31) | 0.82 (0.68,<br>0.99) | 1.03 (0.87,<br>1.22) | 0.70                               |                                          |
| <b>low-fat dairy products</b>     |                                |                      |                      |                      |                                    | 0.55                                     |
| ≤ median NAFLD-GRS                | 1.00<br>(reference)            | 0.99 (0.80,<br>1.23) | 1.07 (0.87,<br>1.31) | 0.84 (0.66,<br>1.08) | 0.43                               |                                          |
| > median NAFLD-GRS                | 1.00<br>(reference)            | 1.00 (0.84,<br>1.19) | 0.81 (0.68,<br>0.97) | 0.75 (0.61,<br>0.93) | <0.01                              |                                          |
| <b>Unfermented dairy products</b> |                                |                      |                      |                      |                                    | 0.98                                     |
| ≤ median NAFLD-GRS                | 1.00<br>(reference)            | 0.95 (0.77,<br>1.17) | 1.08 (0.87,<br>1.35) | 0.85 (0.68,<br>1.06) | 0.33                               |                                          |
| > median NAFLD-GRS                | 1.00                           | 0.95 (0.80,<br>1.19) | 0.79 (0.65,<br>0.93) | 0.86 (0.72,<br>0.99) | 0.04                               |                                          |

|                                 |                     |                      |                      |                      |       |
|---------------------------------|---------------------|----------------------|----------------------|----------------------|-------|
|                                 | (reference)         | 1.13)                | 0.96)                | 1.04)                |       |
| <b>Fermented dairy products</b> |                     |                      |                      |                      | 0.45  |
| ≤ median NAFLD-GRS              | 1.00<br>(reference) | 1.04 (0.83,<br>1.29) | 1.04 (0.85,<br>1.28) | 0.89 (0.71,<br>1.12) | 0.43  |
| > median NAFLD-GRS              | 1.00<br>(reference) | 0.81 (0.67,<br>0.98) | 0.86 (0.72,<br>1.02) | 0.75 (0.62,<br>0.91) | <0.01 |

Abbreviations: BMI, body mass index; NAFLD-GRS, NAFLD-genetic risk score.

Adjusted for age, sex, BMI, total energy intake, diet score, smoking status, alcohol intake, educational level, Townsend deprivation index, physical activity, hypertension, diabetes, cancer, cardiovascular disease, first 10 principal components of ancestry, and genotype measurement batch.

<sup>a</sup> Hazard ratio (95% confidence interval) obtained by using Cox proportional hazard model.

<sup>b</sup> Obtained by using the multivariable Cox proportional hazard model.



**Table S8. Association between dairy consumption and risk of cirrhosis according to cirrhosis-GRS in the UK Biobank Cohort <sup>a</sup>**

|                                   | Quartiles of dairy consumption |                      |                      |                      | <i>P</i> for trend<br><sup>b</sup> | <i>P</i> for<br>interaction <sup>b</sup> |
|-----------------------------------|--------------------------------|----------------------|----------------------|----------------------|------------------------------------|------------------------------------------|
|                                   | Quartile 1                     | Quartile 2           | Quartile 3           | Quartile 4           |                                    |                                          |
| <b>Total dairy products</b>       |                                |                      |                      |                      |                                    | 0.32                                     |
| ≤ median NAFLD-GRS                | 1.00<br>(reference)            | 0.60 (0.42,<br>0.85) | 0.76 (0.55,<br>1.07) | 0.52 (0.35,<br>0.78) | <0.01                              |                                          |
| > median NAFLD-GRS                | 1.00<br>(reference)            | 1.15 (0.85,<br>1.56) | 1.01 (0.73,<br>1.39) | 0.99 (0.71,<br>1.37) | 0.72                               |                                          |
| <b>High-fat dairy products</b>    |                                |                      |                      |                      |                                    | 0.16                                     |
| ≤ median NAFLD-GRS                | 1.00<br>(reference)            | 0.94 (0.63,<br>1.40) | 0.75 (0.52,<br>1.09) | 0.89 (0.64,<br>1.25) | 0.28                               |                                          |
| > median NAFLD-GRS                | 1.00<br>(reference)            | 0.73 (0.50,<br>1.08) | 0.89 (0.66,<br>1.21) | 1.04 (0.79,<br>1.36) | 0.89                               |                                          |
| <b>low-fat dairy products</b>     |                                |                      |                      |                      |                                    | 0.14                                     |
| ≤ median NAFLD-GRS                | 1.00<br>(reference)            | 0.64 (0.44,<br>0.91) | 0.86 (0.63,<br>1.17) | 0.51 (0.33,<br>0.80) | 0.01                               |                                          |
| > median NAFLD-GRS                | 1.00<br>(reference)            | 1.19 (0.89,<br>1.59) | 1.01 (0.76,<br>1.35) | 0.81 (0.57,<br>1.15) | 0.25                               |                                          |
| <b>Unfermented dairy products</b> |                                |                      |                      |                      |                                    | 0.36                                     |
| ≤ median NAFLD-GRS                | 1.00<br>(reference)            | 0.59 (0.42,<br>0.83) | 0.74 (0.52,<br>1.05) | 0.54 (0.37,<br>0.79) | <0.01                              |                                          |
| > median NAFLD-GRS                | 1.00                           | 1.09 (0.81,<br>1.46) | 1.03 (0.75,<br>1.35) | 0.96 (0.70,<br>1.25) | 0.71                               |                                          |

|                                 |                     |                      |                      |                      |      |      |
|---------------------------------|---------------------|----------------------|----------------------|----------------------|------|------|
|                                 | (reference)         | 1.47)                | 1.42)                | 1.31)                |      |      |
| <b>Fermented dairy products</b> |                     |                      |                      |                      |      | 0.08 |
| ≤ median NAFLD-GRS              | 1.00<br>(reference) | 0.92 (0.65,<br>1.30) | 0.88 (0.63,<br>1.23) | 0.62 (0.42,<br>0.92) | 0.03 |      |
| > median NAFLD-GRS              | 1.00<br>(reference) | 0.71 (0.51,<br>0.97) | 0.78 (0.58,<br>1.03) | 0.80 (0.59,<br>1.08) | 0.12 |      |

Abbreviations: BMI, body mass index; cirrhosis-GRS, cirrhosis-genetic risk score.

Adjusted for age, sex, BMI, total energy intake, diet score, smoking status, alcohol intake, educational level, Townsend deprivation index, physical activity, hypertension, diabetes, cancer, cardiovascular disease, first 10 principal components of ancestry, and genotype measurement batch.

<sup>a</sup> Hazard ratio (95% confidence interval) obtained by using Cox proportional hazard model.

<sup>b</sup> Obtained by using the multivariable Cox proportional hazard model.

**Table S9. Association between dairy products consumption and risk of NAFLD, excluded incident NAFLD cases in the first three years of follow-up (n=189,970) <sup>a</sup>**

|                                | Quartiles of dairy products consumption (servings/day) |                   |                   |                   | <i>P</i> for trend <sup>b</sup> |
|--------------------------------|--------------------------------------------------------|-------------------|-------------------|-------------------|---------------------------------|
|                                | Quartile 1                                             | Quartile 2        | Quartile 3        | Quartile 4        |                                 |
| <b>Total dairy products</b>    |                                                        |                   |                   |                   |                                 |
| Median (min, max) intake       | 1.33 (0.00, 2.75)                                      | 4.00 (2.80, 4.83) | 5.50 (4.88, 6.33) | 7.50 (6.38, 10.3) |                                 |
| Number of participants         | 47,690                                                 | 47,961            | 46,874            | 47,445            |                                 |
| Number of cases                | 360                                                    | 339               | 329               | 309               |                                 |
| PYs                            | 546,154                                                | 552,191           | 539,384           | 546,727           |                                 |
| Model 1                        | 1.00 (reference)                                       | 0.93 (0.80, 1.08) | 0.93 (0.80, 1.08) | 0.86 (0.74, 1.00) | 0.06                            |
| Model 2                        | 1.00 (reference)                                       | 0.90 (0.78, 1.05) | 0.92 (0.80, 1.07) | 0.85 (0.73, 0.99) | 0.06                            |
| Model 3                        | 1.00 (reference)                                       | 0.91 (0.78, 1.05) | 0.94 (0.81, 1.09) | 0.87 (0.74, 1.01) | 0.11                            |
| <b>High-fat dairy products</b> |                                                        |                   |                   |                   |                                 |
| Median (min, max) intake       | 0.00 (0.00, 0.00)                                      | 0.25 (0.10, 0.33) | 0.50 (0.38, 0.83) | 1.17 (0.85, 6.50) |                                 |
| Number of participants         | 75,054                                                 | 26,257            | 41,621            | 47,038            |                                 |
| Number of cases                | 611                                                    | 170               | 232               | 324               |                                 |
| PYs                            | 858,538                                                | 304,607           | 481,135           | 540,177           |                                 |
| Model 1                        | 1.00 (reference)                                       | 0.78 (0.66, 0.93) | 0.68 (0.58, 0.79) | 0.84 (0.74, 0.97) | <0.001                          |
| Model 2                        | 1.00 (reference)                                       | 0.85 (0.72, 1.01) | 0.76 (0.66, 0.89) | 0.94 (0.82, 1.08) | 0.07                            |
| Model 3                        | 1.00 (reference)                                       | 0.92 (0.78, 1.09) | 0.82 (0.71, 0.96) | 0.95 (0.83, 1.10) | 0.04                            |
| <b>Low-fat dairy products</b>  |                                                        |                   |                   |                   |                                 |
| Median (min, max) intake       | 0.67 (0.00, 2.00)                                      | 3.33 (2.08, 4.00) | 5.00 (4.06, 6.00) | 7.00 (6.05, 9.25) |                                 |
| Number of participants         | 54,824                                                 | 44,100            | 55,408            | 35,638            |                                 |

|                                   |                   |                   |                   |                   |         |
|-----------------------------------|-------------------|-------------------|-------------------|-------------------|---------|
| Number of cases                   | 417               | 326               | 376               | 218               |         |
| PYs                               | 627,291           | 507,651           | 638,112           | 411,401           |         |
| Model 1                           | 1.00 (reference)  | 0.97 (0.84, 1.12) | 0.89 (0.77, 1.02) | 0.8 (0.68, 0.94)  | <0.01   |
| Model 2                           | 1.00 (reference)  | 0.94 (0.81, 1.08) | 0.87 (0.75, 1.00) | 0.77 (0.65, 0.90) | <0.001  |
| Model 3                           | 1.00 (reference)  | 0.96 (0.83, 1.11) | 0.90 (0.78, 1.04) | 0.80 (0.67, 0.94) | <0.01   |
| <b>Unfermented dairy products</b> |                   |                   |                   |                   |         |
| Median (min, max) intake          | 0.67 (0.00, 2.00) | 3.38 (2.08, 4.00) | 5.00 (4.05, 5.50) | 6.50 (5.56, 9.00) |         |
| Number of participants            | 52,898            | 49,921            | 40,799            | 46,352            |         |
| Number of cases                   | 398               | 352               | 274               | 313               |         |
| PYs                               | 605,373           | 575,085           | 470,034           | 533,963           |         |
| Model 1                           | 1.00 (reference)  | 0.93 (0.81, 1.07) | 0.89 (0.76, 1.03) | 0.89 (0.77, 1.04) | 0.10    |
| Model 2                           | 1.00 (reference)  | 0.93 (0.80, 1.07) | 0.91 (0.78, 1.06) | 0.88 (0.76, 1.03) | 0.10    |
| Model 3                           | 1.00 (reference)  | 0.94 (0.81, 1.08) | 0.94 (0.80, 1.09) | 0.89 (0.76, 1.03) | 0.14    |
| <b>Fermented dairy products</b>   |                   |                   |                   |                   |         |
| Median (min, max) intake          | 0.00 (0.00, 0.25) | 0.50 (0.30, 0.70) | 1.00 (0.75, 1.00) | 1.63 (1.10, 4.50) |         |
| Number of participants            | 54,200            | 40,202            | 48,686            | 46,882            |         |
| Number of cases                   | 462               | 258               | 350               | 267               |         |
| PYs                               | 619,975           | 463,853           | 560,340           | 540,288           |         |
| Model 1                           | 1.00 (reference)  | 0.74 (0.64, 0.87) | 0.84 (0.73, 0.96) | 0.66 (0.57, 0.77) | <0.0001 |
| Model 2                           | 1.00 (reference)  | 0.81 (0.69, 0.94) | 0.89 (0.78, 1.03) | 0.72 (0.62, 0.83) | <0.0001 |
| Model 3                           | 1.00 (reference)  | 0.85 (0.73, 0.99) | 0.94 (0.82, 1.08) | 0.78 (0.67, 0.91) | <0.01   |

Abbreviations: BMI, body mass index; NAFLD-GRS, NAFLD-genetic risk score; PYs, person-years.

<sup>a</sup> Hazard ratios (95% confidence interval) (all such values).

<sup>b</sup> *P* for trend was calculated across quartiles using multivariable Cox regression models.

Model 1 was crude model.

Model 2 was adjusted for age, sex, and BMI.

Model 3 was additionally adjusted for total energy intake, diet score, smoking status, alcohol intake, educational level, Townsend deprivation index, physical activity, hypertension, diabetes, cancer, cardiovascular disease, NAFLD-GRS, first 10 principal components of ancestry, and genotype measurement batch.

**Table S10. Association between dairy products consumption and risk of cirrhosis, excluded incident cirrhosis cases in the first three years of follow-up (n=190,091) <sup>a</sup>**

|                                | Quartiles of dairy products consumption (servings/day) |                   |                   |                   | <i>P</i> for trend <sup>b</sup> |
|--------------------------------|--------------------------------------------------------|-------------------|-------------------|-------------------|---------------------------------|
|                                | Quartile 1                                             | Quartile 2        | Quartile 3        | Quartile 4        |                                 |
| <b>Total dairy products</b>    |                                                        |                   |                   |                   |                                 |
| Median (min, max) intake       | 1.33 (0.00, 2.75)                                      | 4.00 (2.80, 4.83) | 5.50 (4.87, 6.33) | 7.50 (6.38, 10.3) |                                 |
| Number of participants         | 47,708                                                 | 47,995            | 46,894            | 47,464            |                                 |
| Number of cases                | 131                                                    | 124               | 120               | 97                |                                 |
| PYs                            | 547,518                                                | 553,573           | 540,520           | 547,877           |                                 |
| Model 1                        | 1.00 (reference)                                       | 0.94 (0.73, 1.20) | 0.93 (0.73, 1.19) | 0.74 (0.57, 0.96) | 0.04                            |
| Model 2                        | 1.00 (reference)                                       | 0.71 (0.52, 0.96) | 0.77 (0.60, 0.99) | 0.91 (0.73, 1.14) | <0.01                           |
| Model 3                        | 1.00 (reference)                                       | 0.94 (0.73, 1.20) | 0.96 (0.75, 1.23) | 0.78 (0.59, 1.03) | 0.11                            |
| <b>High-fat dairy products</b> |                                                        |                   |                   |                   |                                 |
| Median (min, max) intake       | 0.00 (0.00, 0.00)                                      | 0.25 (0.10, 0.33) | 0.50 (0.38, 0.83) | 1.17 (0.85, 6.50) |                                 |
| Number of participants         | 75,091                                                 | 26,270            | 41,641            | 47,059            |                                 |
| Number of cases                | 217                                                    | 50                | 86                | 119               |                                 |
| PYs                            | 860,787                                                | 305,300           | 482,009           | 541,392           |                                 |
| Model 1                        | 1.00 (reference)                                       | 0.65 (0.48, 0.88) | 0.71 (0.55, 0.91) | 0.87 (0.70, 1.09) | 0.09                            |
| Model 2                        | 1.00 (reference)                                       | 0.71 (0.52, 0.96) | 0.77 (0.60, 0.99) | 0.91 (0.73, 1.14) | 0.23                            |
| Model 3                        | 1.00 (reference)                                       | 0.79 (0.58, 1.08) | 0.86 (0.67, 1.11) | 0.96 (0.76, 1.21) | 0.22                            |
| <b>Low-fat dairy products</b>  |                                                        |                   |                   |                   |                                 |
| Median (min, max) intake       | 0.67 (0.00, 2.00)                                      | 3.33 (2.08, 4.00) | 5.00 (4.06, 6.00) | 7.00 (6.05, 9.25) |                                 |
| Number of participants         | 54,842                                                 | 44,133            | 55,436            | 35,650            |                                 |

|                                   |                   |                   |                   |                   |         |
|-----------------------------------|-------------------|-------------------|-------------------|-------------------|---------|
| Number of cases                   | 149               | 117               | 144               | 62                |         |
| PYs                               | 628,839           | 509,023           | 639,390           | 412,237           |         |
| Model 1                           | 1.00 (reference)  | 0.97 (0.76, 1.24) | 0.95 (0.76, 1.20) | 0.64 (0.47, 0.85) | 0.01    |
| Model 2                           | 1.00 (reference)  | 0.94 (0.74, 1.20) | 0.90 (0.71, 1.13) | 0.59 (0.44, 0.79) | <0.001  |
| Model 3                           | 1.00 (reference)  | 0.97 (0.76, 1.24) | 0.98 (0.78, 1.24) | 0.68 (0.50, 0.92) | 0.05    |
| <b>Unfermented dairy products</b> |                   |                   |                   |                   |         |
| Median (min, max) intake          | 0.67 (0.00, 2.00) | 3.38 (2.08, 4.00) | 5.00 (4.05, 5.50) | 6.50 (5.56, 9.00) |         |
| Number of participants            | 52,920            | 49,959            | 40,813            | 46,369            |         |
| Number of cases                   | 143               | 127               | 102               | 100               |         |
| PYs                               | 606,910           | 576,549           | 470,911           | 535,118           |         |
| Model 1                           | 1.00 (reference)  | 0.94 (0.74, 1.19) | 0.92 (0.71, 1.19) | 0.80 (0.62, 1.03) | 0.09    |
| Model 2                           | 1.00 (reference)  | 0.90 (0.71, 1.14) | 0.87 (0.68, 1.13) | 0.72 (0.56, 0.93) | 0.01    |
| Model 3                           | 1.00 (reference)  | 0.91 (0.72, 1.16) | 0.95 (0.73, 1.23) | 0.78 (0.60, 1.02) | 0.1     |
| <b>Fermented dairy products</b>   |                   |                   |                   |                   |         |
| Median (min, max) intake          | 0.00 (0.00, 0.25) | 0.50 (0.30, 0.70) | 1.00 (0.75, 1.00) | 1.83 (1.10, 4.50) |         |
| Number of participants            | 54,222            | 40,230            | 48,701            | 46,908            |         |
| Number of cases                   | 176               | 91                | 111               | 94                |         |
| PYs                               | 621,636           | 464,928           | 561,565           | 541,359           |         |
| Model 1                           | 1.00 (reference)  | 0.69 (0.54, 0.89) | 0.70 (0.55, 0.89) | 0.61 (0.48, 0.79) | <0.0001 |
| Model 2                           | 1.00 (reference)  | 0.75 (0.58, 0.96) | 0.76 (0.60, 0.96) | 0.68 (0.53, 0.87) | <0.01   |
| Model 3                           | 1.00 (reference)  | 0.80 (0.62, 1.03) | 0.82 (0.65, 1.04) | 0.78 (0.60, 1.00) | 0.04    |

Abbreviations: BMI, body mass index; cirrhosis-GRS, cirrhosis genetic risk score; PYs, person-years.

<sup>a</sup> Hazard ratios (95% confidence interval) (all such values).

<sup>b</sup> *P* for trend was calculated across quartiles using multivariable Cox regression models.

Model 1 was crude model.

Model 2 was adjusted for age, sex, and BMI.

Model 3 was additionally adjusted for total energy intake, diet score, smoking status, alcohol intake, educational level, Townsend deprivation index, physical activity, hypertension, diabetes, cancer, cardiovascular disease, cirrhosis-GRS, first 10 principal components of ancestry, and genotype measurement batch.



**Table S11. Association between dairy products consumption and risk of NAFLD with heavy alcohol consumption (n=155,111) <sup>a</sup>**

|                                | Quartiles of dairy products consumption (servings/day) |                   |                   |                   | <i>P</i> for trend <sup>b</sup> |
|--------------------------------|--------------------------------------------------------|-------------------|-------------------|-------------------|---------------------------------|
|                                | Quartile 1                                             | Quartile 2        | Quartile 3        | Quartile 4        |                                 |
| <b>Total dairy products</b>    |                                                        |                   |                   |                   |                                 |
| Median (min, max) intake       | 1.50 (0.00, 3.00)                                      | 4.25 (3.08, 5.00) | 6.00 (5.05, 6.50) | 7.50 (6.55, 10.3) |                                 |
| Number of participants         | 45,134                                                 | 41,077            | 33,274            | 35,626            |                                 |
| Number of cases                | 379                                                    | 345               | 255               | 257               |                                 |
| PYs                            | 516,545                                                | 472,082           | 383,005           | 410,228           |                                 |
| Model 1                        | 1.00 (reference)                                       | 1.00 (0.86, 1.15) | 0.91 (0.77, 1.06) | 0.86 (0.73, 1.00) | 0.03                            |
| Model 2                        | 1.00 (reference)                                       | 1.00 (0.86, 1.15) | 0.92 (0.79, 1.08) | 0.87 (0.74, 1.01) | 0.05                            |
| Model 3                        | 1.00 (reference)                                       | 1.02 (0.88, 1.18) | 0.95 (0.81, 1.12) | 0.86 (0.73, 1.02) | 0.06                            |
| <b>High-fat dairy products</b> |                                                        |                   |                   |                   |                                 |
| Median (min, max) intake       | 0.00 (0.00, 0.00)                                      | 0.25 (0.10, 0.30) | 0.50 (0.33, 0.83) | 1.17 (0.88, 6.50) |                                 |
| Number of participants         | 62,164                                                 | 15,730            | 39,529            | 37,688            |                                 |
| Number of cases                | 582                                                    | 112               | 260               | 282               |                                 |
| PYs                            | 710,466                                                | 182,694           | 456,284           | 432,416           |                                 |
| Model 1                        | 1.00 (reference)                                       | 0.75 (0.61, 0.92) | 0.69 (0.6, 0.8)   | 0.80 (0.69, 0.92) | <0.0001                         |
| Model 2                        | 1.00 (reference)                                       | 0.83 (0.68, 1.02) | 0.79 (0.68, 0.91) | 0.91 (0.79, 1.05) | 0.03                            |
| Model 3                        | 1.00 (reference)                                       | 0.91 (0.74, 1.11) | 0.85 (0.73, 0.98) | 0.90 (0.78, 1.05) | 0.06                            |
| <b>Low-fat dairy products</b>  |                                                        |                   |                   |                   |                                 |
| Median (min, max) intake       | 0.67 (0.00, 2.00)                                      | 3.33 (2.08, 4.00) | 5.00 (4.06, 6.00) | 7.00 (6.05, 9.25) |                                 |
| Number of participants         | 43,724                                                 | 34,627            | 45,742            | 31,018            |                                 |

|                                   |                   |                   |                   |                   |         |
|-----------------------------------|-------------------|-------------------|-------------------|-------------------|---------|
| Number of cases                   | 360               | 301               | 358               | 217               |         |
| PYs                               | 499,919           | 397,949           | 526,359           | 357,633           |         |
| Model 1                           | 1.00 (reference)  | 1.05 (0.90, 1.22) | 0.95 (0.82, 1.09) | 0.84 (0.71, 1.00) | 0.03    |
| Model 2                           | 1.00 (reference)  | 1.01 (0.87, 1.18) | 0.92 (0.80, 1.07) | 0.81 (0.68, 0.95) | <0.01   |
| Model 3                           | 1.00 (reference)  | 1.05 (0.90, 1.22) | 0.96 (0.83, 1.11) | 0.82 (0.69, 0.98) | 0.03    |
| <b>Unfermented dairy products</b> |                   |                   |                   |                   |         |
| Median (min, max) intake          | 0.67 (0.00, 2.00) | 3.40 (2.08, 4.00) | 5.00 (4.05, 5.67) | 6.50 (5.70, 9.00) |         |
| Number of participants            | 42,264            | 39,351            | 35,245            | 38,251            |         |
| Number of cases                   | 353               | 323               | 271               | 289               |         |
| PYs                               | 483,268           | 452,715           | 405,803           | 440,074           |         |
| Model 1                           | 1.00 (reference)  | 0.98 (0.84, 1.14) | 0.91 (0.78, 1.07) | 0.90 (0.77, 1.05) | 0.14    |
| Model 2                           | 1.00 (reference)  | 0.97 (0.83, 1.13) | 0.94 (0.80, 1.10) | 0.89 (0.76, 1.04) | 0.12    |
| Model 3                           | 1.00 (reference)  | 0.99 (0.85, 1.15) | 0.97 (0.83, 1.14) | 0.87 (0.74, 1.03) | 0.10    |
| <b>Fermented dairy products</b>   |                   |                   |                   |                   |         |
| Median (min, max) intake          | 0.00 (0.00, 0.25) | 0.50 (0.30, 0.70) | 1.00 (0.75, 1.13) | 1.67 (1.17, 4.50) |         |
| Number of participants            | 43,373            | 32,521            | 41,447            | 37,770            |         |
| Number of cases                   | 428               | 238               | 319               | 251               |         |
| PYs                               | 495,683           | 374,706           | 476,972           | 434,499           |         |
| Model 1                           | 1.00 (reference)  | 0.73 (0.63, 0.86) | 0.77 (0.67, 0.90) | 0.67 (0.57, 0.78) | <0.0001 |
| Model 2                           | 1.00 (reference)  | 0.80 (0.68, 0.94) | 0.83 (0.72, 0.96) | 0.72 (0.62, 0.85) | <0.0001 |
| Model 3                           | 1.00 (reference)  | 0.84 (0.72, 0.98) | 0.87 (0.75, 1.01) | 0.78 (0.66, 0.91) | <0.01   |

Abbreviations: BMI, body mass index; NAFLD-GRS, NAFLD-genetic risk score; PYs, person-years.

<sup>a</sup> Hazard ratios (95% confidence interval) (all such values).

<sup>b</sup> *P* for trend was calculated across quartiles using multivariable Cox regression models.

Model 1 was crude model.

Model 2 was adjusted for age, sex, and BMI.

Model 3 was additionally adjusted for total energy intake, diet score, smoking status, alcohol intake, educational level, Townsend deprivation index, physical activity, hypertension, diabetes, cancer, cardiovascular disease, NAFLD-GRS, first 10 principal components of ancestry, and genotype measurement batch.

**Table S12. Association between dairy products consumption and risk of cirrhosis with heavy alcohol consumption (n=155,111) <sup>a</sup>**

|                                | Quartiles of dairy products consumption (servings/day) |                   |                   |                   | <i>P</i> for trend <sup>b</sup> |
|--------------------------------|--------------------------------------------------------|-------------------|-------------------|-------------------|---------------------------------|
|                                | Quartile 1                                             | Quartile 2        | Quartile 3        | Quartile 4        |                                 |
| <b>Total dairy products</b>    |                                                        |                   |                   |                   |                                 |
| Median (min, max) intake       | 1.50 (0.00, 3.00)                                      | 4.25 (3.08, 5.00) | 6.00 (5.05, 6.50) | 7.50 (6.55, 10.3) |                                 |
| Number of participants         | 45,134                                                 | 41,077            | 33,274            | 35,626            |                                 |
| Number of cases                | 122                                                    | 114               | 91                | 78                |                                 |
| PYs                            | 517,904                                                | 473,251           | 383,804           | 411,102           |                                 |
| Model 1                        | 1.00 (reference)                                       | 1.02 (0.79, 1.32) | 1.01 (0.77, 1.32) | 0.81 (0.61, 1.07) | 0.18                            |
| Model 2                        | 1.00 (reference)                                       | 0.96 (0.75, 1.24) | 0.93 (0.71, 1.22) | 0.72 (0.54, 0.96) | 0.03                            |
| Model 3                        | 1.00 (reference)                                       | 0.98 (0.75, 1.26) | 0.96 (0.73, 1.26) | 0.74 (0.55, 0.99) | 0.06                            |
| <b>High-fat dairy products</b> |                                                        |                   |                   |                   |                                 |
| Median (min, max) intake       | 0.00 (0.00, 0.00)                                      | 0.25 (0.10, 0.30) | 0.50 (0.33, 0.83) | 1.17 (0.88, 6.50) |                                 |
| Number of participants         | 62,164                                                 | 15,730            | 39,529            | 37,688            |                                 |
| Number of cases                | 189                                                    | 42                | 86                | 88                |                                 |
| PYs                            | 712,388                                                | 183,058           | 457,163           | 433,452           |                                 |
| Model 1                        | 1.00 (reference)                                       | 0.87 (0.62, 1.21) | 0.71 (0.55, 0.91) | 0.77 (0.60, 0.99) | <0.01                           |
| Model 2                        | 1.00 (reference)                                       | 0.95 (0.68, 1.33) | 0.78 (0.60, 1.00) | 0.81 (0.63, 1.05) | 0.04                            |
| Model 3                        | 1.00 (reference)                                       | 1.06 (0.75, 1.48) | 0.86 (0.67, 1.12) | 0.86 (0.67, 1.12) | 0.17                            |
| <b>Low-fat dairy products</b>  |                                                        |                   |                   |                   |                                 |
| Median (min, max) intake       | 0.67 (0.00, 2.00)                                      | 3.33 (2.08, 4.00) | 5.00 (4.06, 6.00) | 7.00 (6.05, 9.25) |                                 |
| Number of participants         | 43,724                                                 | 34,627            | 45,742            | 31,018            |                                 |

|                                   |                   |                   |                   |                   |         |
|-----------------------------------|-------------------|-------------------|-------------------|-------------------|---------|
| Number of cases                   | 106               | 97                | 138               | 64                |         |
| PYs                               | 501,229           | 399,050           | 527,411           | 358,372           |         |
| Model 1                           | 1.00 (reference)  | 1.15 (0.87, 1.51) | 1.24 (0.96, 1.60) | 0.85 (0.62, 1.15) | 0.71    |
| Model 2                           | 1.00 (reference)  | 1.11 (0.84, 1.46) | 1.15 (0.89, 1.48) | 0.75 (0.55, 1.02) | 0.12    |
| Model 3                           | 1.00 (reference)  | 1.13 (0.86, 1.49) | 1.19 (0.92, 1.54) | 0.79 (0.57, 1.07) | 0.29    |
| <b>Unfermented dairy products</b> |                   |                   |                   |                   |         |
| Median (min, max) intake          | 0.67 (0.00, 2.00) | 3.40 (2.08, 4.00) | 5.00 (4.05, 5.67) | 6.50 (5.70, 9.00) |         |
| Number of participants            | 42,264            | 39,351            | 35,245            | 38,251            |         |
| Number of cases                   | 106               | 104               | 96                | 99                |         |
| PYs                               | 484,562           | 453,886           | 406,612           | 441,000           |         |
| Model 1                           | 1.00 (reference)  | 1.05 (0.80, 1.37) | 1.08 (0.82, 1.42) | 1.03 (0.78, 1.35) | 0.79    |
| Model 2                           | 1.00 (reference)  | 0.99 (0.76, 1.30) | 0.99 (0.75, 1.31) | 0.89 (0.68, 1.18) | 0.45    |
| Model 3                           | 1.00 (reference)  | 0.99 (0.76, 1.30) | 1.02 (0.77, 1.35) | 0.89 (0.67, 1.18) | 0.48    |
| <b>Fermented dairy products</b>   |                   |                   |                   |                   |         |
| Median (min, max) intake          | 0.00 (0.00, 0.25) | 0.50 (0.30, 0.70) | 1.00 (0.75, 1.13) | 1.67 (1.17, 4.50) |         |
| Number of participants            | 43,373            | 32,521            | 41,447            | 37,770            |         |
| Number of cases                   | 153               | 79                | 98                | 75                |         |
| PYs                               | 497,091           | 375,548           | 477,999           | 435,423           |         |
| Model 1                           | 1.00 (reference)  | 0.68 (0.52, 0.90) | 0.67 (0.52, 0.86) | 0.56 (0.42, 0.74) | <0.0001 |
| Model 2                           | 1.00 (reference)  | 0.74 (0.56, 0.97) | 0.72 (0.56, 0.92) | 0.61 (0.47, 0.81) | <0.01   |
| Model 3                           | 1.00 (reference)  | 0.79 (0.60, 1.04) | 0.76 (0.59, 0.98) | 0.68 (0.52, 0.91) | 0.02    |

Abbreviations: BMI, body mass index; cirrhosis-GRS, cirrhosis genetic risk score; PYs, person-years.

<sup>a</sup> Hazard ratios (95% confidence interval) (all such values).

<sup>b</sup> *P* for trend was calculated across quartiles using multivariable Cox regression models.

Model 1 was crude model.

Model 2 was adjusted for age, sex, and BMI.

Model 3 was additionally adjusted for total energy intake, diet score, smoking status, alcohol intake, educational level, Townsend deprivation index, physical activity, hypertension, diabetes, cancer, cardiovascular disease, cirrhosis-GRS, first 10 principal components of ancestry, and genotype measurement batch.

**Table S13. Association between dairy products consumption (g/day) and risk of NAFLD (n=190,145) <sup>a</sup>**

|                                | Quartiles of dairy products consumption (g/day) |                      |                      |                      | <i>P</i> for trend<br><sup>b</sup> |
|--------------------------------|-------------------------------------------------|----------------------|----------------------|----------------------|------------------------------------|
|                                | Quartile 1                                      | Quartile 2           | Quartile 3           | Quartile 4           |                                    |
| <b>Total dairy products</b>    |                                                 |                      |                      |                      |                                    |
| Median (min, max) intake       | 97.5 (0.00, 160.0)                              | 210.0 (160.1, 256.8) | 302.5 (256.8, 356.3) | 435.0 (356.3, 510.0) |                                    |
| Number of participants         | 47,647                                          | 47,441               | 47,581               | 47,476               |                                    |
| Number of cases                | 431                                             | 368                  | 359                  | 354                  |                                    |
| PYs                            | 543,996                                         | 545,213              | 548,069              | 547,465              |                                    |
| Model 1                        | 1.00 (reference)                                | 0.85 (0.74, 0.98)    | 0.83 (0.72, 0.95)    | 0.82 (0.71, 0.94)    | <0.01                              |
| Model 2                        | 1.00 (reference)                                | 0.86 (0.75, 0.99)    | 0.86 (0.74, 0.99)    | 0.84 (0.73, 0.97)    | 0.02                               |
| Model 3                        | 1.00 (reference)                                | 0.86 (0.75, 0.99)    | 0.87 (0.76, 1.00)    | 0.87 (0.76, 1.01)    | 0.08                               |
| <b>High-fat dairy products</b> |                                                 |                      |                      |                      |                                    |
| Median (min, max) intake       | 0.00 (0.00, 0.00)                               | 10.0 (1.50, 13.3)    | 25.6 (13.5, 40.0)    | 83.3 (40.4, 161.7)   |                                    |
| Number of participants         | 75,128                                          | 25,462               | 55,128               | 34,427               |                                    |
| Number of cases                | 685                                             | 193                  | 390                  | 244                  |                                    |
| PYs                            | 858,666                                         | 294,959              | 635,168              | 395,949              |                                    |
| Model 1                        | 1.00 (reference)                                | 0.82 (0.70, 0.96)    | 0.77 (0.68, 0.87)    | 0.77 (0.67, 0.89)    | <0.0001                            |
| Model 2                        | 1.00 (reference)                                | 0.90 (0.76, 1.05)    | 0.84 (0.74, 0.95)    | 0.93 (0.80, 1.08)    | 0.04                               |
| Model 3                        | 1.00 (reference)                                | 0.94 (0.80, 1.11)    | 0.87 (0.77, 0.99)    | 0.97 (0.83, 1.12)    | 0.16                               |
| <b>Low-fat dairy products</b>  |                                                 |                      |                      |                      |                                    |
| Median (min, max) intake       | 35.0 (0.00,                                     | 175.0 (120.3,        | 268.3 (220.1,        | 400.0 (319.7,        |                                    |

|                        |                  |                   |                   |                   |       |
|------------------------|------------------|-------------------|-------------------|-------------------|-------|
|                        | 120.0)           | 220.0)            | 319.6)            | 470.0)            |       |
| Number of participants | 47,961           | 47,128            | 47,524            | 47,532            |       |
| Number of cases        | 427              | 376               | 363               | 346               |       |
| PYs                    | 548,024          | 542,297           | 547,258           | 547,164           |       |
| Model 1                | 1.00 (reference) | 0.89 (0.77, 1.02) | 0.85 (0.74, 0.98) | 0.81 (0.70, 0.94) | <0.01 |
| Model 2                | 1.00 (reference) | 0.86 (0.75, 0.99) | 0.84 (0.73, 0.97) | 0.80 (0.69, 0.92) | <0.01 |
| Model 3                | 1.00 (reference) | 0.87 (0.76, 1.00) | 0.86 (0.75, 0.99) | 0.82 (0.71, 0.95) | <0.01 |

**Unfermented dairy products**

|                          |                    |                      |                      |                      |      |
|--------------------------|--------------------|----------------------|----------------------|----------------------|------|
| Median (min, max) intake | 35.0 (0.00, 105.0) | 170.0 (105.4, 205.0) | 240.0 (205.1, 280.0) | 346.8 (280.0, 414.8) |      |
| Number of participants   | 49,589             | 49,529               | 43,588               | 47,439               |      |
| Number of cases          | 434                | 398                  | 327                  | 353                  |      |
| PYs                      | 566,988            | 569,944              | 501,847              | 545,964              |      |
| Model 1                  | 1.00 (reference)   | 0.91 (0.80, 1.05)    | 0.85 (0.74, 0.98)    | 0.85 (0.74, 0.97)    | 0.01 |
| Model 2                  | 1.00 (reference)   | 0.91 (0.80, 1.04)    | 0.87 (0.75, 1.00)    | 0.87 (0.75, 1.00)    | 0.03 |
| Model 3                  | 1.00 (reference)   | 0.91 (0.80, 1.05)    | 0.86 (0.75, 1.00)    | 0.87 (0.75, 1.00)    | 0.03 |

**Fermented dairy products**

|                          |                   |                   |                    |                      |  |
|--------------------------|-------------------|-------------------|--------------------|----------------------|--|
| Median (min, max) intake | 0.00 (0.00, 0.00) | 20.0 (1.50, 39.5) | 62.5 (40.0, 102.5) | 132.5 (103.0, 165.0) |  |
| Number of participants   | 51,260            | 35,509            | 56,343             | 47,033               |  |
| Number of cases          | 480               | 279               | 403                | 350                  |  |
| PYs                      | 584,011           | 405,497           | 653,411            | 541,823              |  |



|         |                  |                   |                   |                   |         |
|---------|------------------|-------------------|-------------------|-------------------|---------|
| Model 1 | 1.00 (reference) | 0.83 (0.72, 0.97) | 0.75 (0.66, 0.86) | 0.79 (0.69, 0.90) | <0.0001 |
| Model 2 | 1.00 (reference) | 0.93 (0.80, 1.07) | 0.83 (0.73, 0.95) | 0.85 (0.74, 0.98) | <0.01   |
| Model 3 | 1.00 (reference) | 0.97 (0.84, 1.12) | 0.88 (0.77, 1.01) | 0.93 (0.81, 1.07) | 0.14    |

Abbreviations: BMI, body mass index; NAFLD-GRS, NAFLD-genetic risk score; PYs, person-years.

<sup>a</sup> Hazard ratios (95% confidence interval) (all such values).

<sup>b</sup> *P* for trend was calculated across quartiles using multivariable Cox regression models.

Model 1 was crude model.

Model 2 was adjusted for age, sex, and BMI.

Model 3 was additionally adjusted for total energy intake, diet score, smoking status, alcohol intake, educational level, Townsend deprivation index, physical activity, hypertension, diabetes, cancer, cardiovascular disease, NAFLD-GRS, first 10 principal components of ancestry, and genotype measurement batch.

**Table S14. Association between dairy products consumption (g/day) and risk of cirrhosis (n=190,145) <sup>a</sup>**

|                                | Quartiles of dairy products consumption (g/day) |                      |                      |                      | <i>P</i> for trend<br><sup>b</sup> |
|--------------------------------|-------------------------------------------------|----------------------|----------------------|----------------------|------------------------------------|
|                                | Quartile 1                                      | Quartile 2           | Quartile 3           | Quartile 4           |                                    |
| <b>Total dairy products</b>    |                                                 |                      |                      |                      |                                    |
| Median (min, max) intake       | 97.5 (0.00, 160.0)                              | 210.0 (160.1, 256.8) | 302.5 (256.8, 356.3) | 435.0 (356.3, 510.0) |                                    |
| Number of participants         | 47,647                                          | 47,441               | 47,581               | 47,476               |                                    |
| Number of cases                | 174                                             | 136                  | 127                  | 119                  |                                    |
| PYs                            | 545,404                                         | 546,436              | 549,215              | 548,590              |                                    |
| Model 1                        | 1.00 (reference)                                | 0.78 (0.63, 0.98)    | 0.73 (0.58, 0.91)    | 0.68 (0.54, 0.86)    | <0.001                             |
| Model 2                        | 1.00 (reference)                                | 0.74 (0.59, 0.93)    | 0.71 (0.56, 0.89)    | 0.66 (0.53, 0.84)    | <0.001                             |
| Model 3                        | 1.00 (reference)                                | 0.78 (0.62, 0.97)    | 0.78 (0.62, 0.98)    | 0.77 (0.61, 0.98)    | 0.03                               |
| <b>High-fat dairy products</b> |                                                 |                      |                      |                      |                                    |
| Median (min, max) intake       | 0.00 (0.00, 0.00)                               | 10.0 (1.50, 13.3)    | 25.6 (13.5, 40.0)    | 83.3 (40.4, 161.7)   |                                    |
| Number of participants         | 75,128                                          | 25,462               | 55,128               | 34,427               |                                    |
| Number of cases                | 254                                             | 60                   | 150                  | 92                   |                                    |
| PYs                            | 860,857                                         | 295,662              | 636,428              | 396,698              |                                    |
| Model 1                        | 1.00 (reference)                                | 0.69 (0.52, 0.91)    | 0.80 (0.65, 0.98)    | 0.79 (0.62, 1.00)    | 0.02                               |
| Model 2                        | 1.00 (reference)                                | 0.75 (0.56, 0.99)    | 0.84 (0.69, 1.03)    | 0.86 (0.68, 1.09)    | 0.11                               |
| Model 3                        | 1.00 (reference)                                | 0.79 (0.60, 1.05)    | 0.86 (0.70, 1.05)    | 0.88 (0.69, 1.12)    | 0.15                               |
| <b>Low-fat dairy products</b>  |                                                 |                      |                      |                      |                                    |
| Median (min, max) intake       | 35.0 (0.00,                                     | 175.0 (120.3,        | 268.3 (220.1,        | 400.0 (319.7,        |                                    |

|                        |                  |                   |                   |                   |         |
|------------------------|------------------|-------------------|-------------------|-------------------|---------|
|                        | 120.0)           | 220.0)            | 319.6)            | 470.0)            |         |
| Number of participants | 47,961           | 47,128            | 47,524            | 47,532            |         |
| Number of cases        | 180              | 135               | 127               | 114               |         |
| PYs                    | 549,416          | 543,476           | 548,468           | 548,285           |         |
| Model 1                | 1.00 (reference) | 0.76 (0.61, 0.95) | 0.71 (0.56, 0.89) | 0.63 (0.50, 0.80) | <0.0001 |
| Model 2                | 1.00 (reference) | 0.73 (0.59, 0.92) | 0.68 (0.54, 0.85) | 0.61 (0.48, 0.77) | <0.0001 |
| Model 3                | 1.00 (reference) | 0.76 (0.61, 0.95) | 0.75 (0.59, 0.94) | 0.71 (0.56, 0.90) | <0.01   |

**Unfermented dairy products**

|                          |                    |                      |                      |                      |         |
|--------------------------|--------------------|----------------------|----------------------|----------------------|---------|
| Median (min, max) intake | 35.0 (0.00, 105.0) | 170.0 (105.4, 205.0) | 240.0 (205.1, 280.0) | 346.8 (280.0, 414.8) |         |
| Number of participants   | 49,589             | 49,529               | 43,588               | 47,439               |         |
| Number of cases          | 178                | 145                  | 118                  | 115                  |         |
| PYs                      | 568,420            | 571,172              | 502,901              | 547,152              |         |
| Model 1                  | 1.00 (reference)   | 0.81 (0.65, 1.01)    | 0.75 (0.60, 0.95)    | 0.67 (0.53, 0.85)    | <0.001  |
| Model 2                  | 1.00 (reference)   | 0.77 (0.62, 0.96)    | 0.71 (0.56, 0.89)    | 0.63 (0.50, 0.79)    | <0.0001 |
| Model 3                  | 1.00 (reference)   | 0.78 (0.63, 0.98)    | 0.74 (0.59, 0.94)    | 0.69 (0.54, 0.87)    | <0.01   |

**Fermented dairy products**

|                          |                   |                   |                    |                      |  |
|--------------------------|-------------------|-------------------|--------------------|----------------------|--|
| Median (min, max) intake | 0.00 (0.00, 0.00) | 20.0 (1.50, 39.5) | 62.5 (40.0, 102.5) | 132.5 (103.0, 165.0) |  |
| Number of participants   | 51,260            | 35,509            | 56,343             | 47,033               |  |
| Number of cases          | 210               | 97                | 131                | 118                  |  |
| PYs                      | 585,514           | 406,445           | 654,748            | 542,938              |  |

|         |                  |                   |                   |                   |         |
|---------|------------------|-------------------|-------------------|-------------------|---------|
| Model 1 | 1.00 (reference) | 0.66 (0.52, 0.84) | 0.56 (0.45, 0.70) | 0.61 (0.49, 0.76) | <0.0001 |
| Model 2 | 1.00 (reference) | 0.71 (0.56, 0.90) | 0.62 (0.50, 0.77) | 0.68 (0.54, 0.85) | <0.0001 |
| Model 3 | 1.00 (reference) | 0.73 (0.57, 0.93) | 0.67 (0.54, 0.83) | 0.79 (0.63, 1.00) | <0.01   |

Abbreviations: BMI, body mass index; cirrhosis-GRS, cirrhosis genetic risk score; PYs, person-years.

<sup>a</sup> Hazard ratios (95% confidence interval) (all such values).

<sup>b</sup> *P* for trend was calculated across quartiles using multivariable Cox regression models.

Model 1 was crude model.

Model 2 was adjusted for age, sex, and BMI.

Model 3 was additionally adjusted for total energy intake, diet score, smoking status, alcohol intake, educational level, Townsend deprivation index, physical activity, hypertension, diabetes, cancer, cardiovascular disease, cirrhosis-GRS, first 10 principal components of ancestry, and genotype measurement batch.

**Table S15. Association between dairy consumption and risk of NAFLD according to healthy diet score in the UK Biobank Cohort <sup>a</sup>**

|                                   | Quartiles of dairy consumption |                      |                      |                      | <i>P</i> for trend<br>b | <i>P</i> for interaction<br>b |
|-----------------------------------|--------------------------------|----------------------|----------------------|----------------------|-------------------------|-------------------------------|
|                                   | Q1                             | Q2                   | Q3                   | Q4                   |                         |                               |
| <b>Total dairy products</b>       |                                |                      |                      |                      |                         | 0.26                          |
| low healthy diet score            | 1.00<br>(reference)            | 1.00 (0.84,<br>1.20) | 0.82 (0.67,<br>1.00) | 0.90 (0.74,<br>1.10) | 0.11                    |                               |
| high healthy diet score           | 1.00<br>(reference)            | 0.92 (0.74,<br>1.13) | 1.09 (0.89,<br>1.34) | 0.86 (0.69,<br>1.07) | 0.49                    |                               |
| <b>High-fat dairy products</b>    |                                |                      |                      |                      |                         | 0.11                          |
| low healthy diet score            | 1.00<br>(reference)            | 1.08 (0.86,<br>1.35) | 1.00 (0.85,<br>1.18) | 1.17 (0.95,<br>1.45) | 0.31                    |                               |
| high healthy diet score           | 1.00<br>(reference)            | 0.99 (0.81,<br>1.22) | 1.07 (0.86,<br>1.32) | 0.90 (0.72,<br>1.12) | 0.47                    |                               |
| <b>low-fat dairy products</b>     |                                |                      |                      |                      |                         | 0.19                          |
| low healthy diet score            | 1.00<br>(reference)            | 0.98 (0.82,<br>1.18) | 0.78 (0.65,<br>0.93) | 0.76 (0.61,<br>0.94) | <0.01                   |                               |
| high healthy diet score           | 1.00<br>(reference)            | 0.79 (0.60,<br>1.03) | 0.79 (0.65,<br>0.96) | 0.77 (0.63,<br>0.94) | <0.01                   |                               |
| <b>Unfermented dairy products</b> |                                |                      |                      |                      |                         | 0.24                          |
| low healthy diet score            | 1.00<br>(reference)            | 0.97 (0.81,<br>1.16) | 0.82 (0.67,<br>1.00) | 0.84 (0.69,<br>1.03) | 0.03                    |                               |
| high healthy diet score           | 1.00<br>(reference)            | 0.90 (0.74,<br>1.09) | 1.01 (0.81,<br>1.26) | 0.86 (0.69,<br>1.06) | 0.29                    |                               |

|                                 |                     |                      |                      |                      |       |      |
|---------------------------------|---------------------|----------------------|----------------------|----------------------|-------|------|
| <b>Fermented dairy products</b> |                     |                      |                      |                      |       | 0.65 |
| low healthy diet score          | 1.00<br>(reference) | 0.94 (0.79,<br>1.13) | 0.83 (0.68,<br>1.02) | 0.81 (0.67,<br>0.99) | 0.04  |      |
| high healthy diet score         | 1.00<br>(reference) | 0.93 (0.76,<br>1.13) | 0.75 (0.61,<br>0.92) | 0.78 (0.63,<br>0.96) | <0.01 |      |

Abbreviations: BMI, body mass index; NAFLD-GRS, NAFLD-genetic risk score.

Adjusted for age, sex, BMI, total energy intake, diet score, smoking status, alcohol intake, educational level, Townsend deprivation index, physical activity, hypertension, diabetes, cancer, cardiovascular disease, NAFLD-GRS, first 10 principal components of ancestry, and genotype measurement batch.

<sup>a</sup> Hazard ratio (95% confidence interval) obtained by using Cox proportional hazard model.

<sup>b</sup> Obtained by using the multivariable Cox proportional hazard model.

**Table S16. Association between dairy consumption and risk of cirrhosis according to healthy diet score in the UK Biobank Cohort <sup>a</sup>**

|                                   | Quartiles of dairy consumption |                      |                      |                      | <i>P</i> for trend<br>b | <i>P</i> for interaction<br>b |
|-----------------------------------|--------------------------------|----------------------|----------------------|----------------------|-------------------------|-------------------------------|
|                                   | Q1                             | Q2                   | Q3                   | Q4                   |                         |                               |
| <b>Total dairy products</b>       |                                |                      |                      |                      |                         | 0.32                          |
| low healthy diet score            | 1.00<br>(reference)            | 0.74 (0.55,<br>0.98) | 0.69 (0.50,<br>0.96) | 0.78 (0.57,<br>1.07) | 0.08                    |                               |
| high healthy diet score           | 1.00<br>(reference)            | 0.99 (0.70,<br>1.40) | 1.20 (0.86,<br>1.67) | 0.74 (0.50,<br>1.10) | 0.38                    |                               |
| <b>High-fat dairy products</b>    |                                |                      |                      |                      |                         | 0.16                          |
| low healthy diet score            | 1.00<br>(reference)            | 0.76 (0.51,<br>1.14) | 0.90 (0.69,<br>1.17) | 1.05 (0.75,<br>1.46) | 0.89                    |                               |
| high healthy diet score           | 1.00<br>(reference)            | 0.97 (0.63,<br>1.49) | 0.85 (0.61,<br>1.17) | 0.86 (0.61,<br>1.20) | 0.26                    |                               |
| <b>low-fat dairy products</b>     |                                |                      |                      |                      |                         | 0.14                          |
| low healthy diet score            | 1.00<br>(reference)            | 0.87 (0.65,<br>1.16) | 0.70 (0.52,<br>0.94) | 0.70 (0.49,<br>0.99) | 0.01                    |                               |
| high healthy diet score           | 1.00<br>(reference)            | 0.95 (0.68,<br>1.34) | 1.38 (0.98,<br>1.94) | 0.71 (0.47,<br>1.05) | 0.42                    |                               |
| <b>Unfermented dairy products</b> |                                |                      |                      |                      |                         | 0.36                          |
| low healthy diet score            | 1.00<br>(reference)            | 0.77 (0.57,<br>1.03) | 0.56 (0.40,<br>0.78) | 0.79 (0.58,<br>1.08) | 0.04                    |                               |
| high healthy diet score           | 1.00<br>(reference)            | 1.37 (0.96,<br>1.94) | 0.84 (0.60,<br>1.17) | 0.69 (0.46,<br>1.01) | 0.07                    |                               |

|                                 |                     |                      |                      |                      |       |      |
|---------------------------------|---------------------|----------------------|----------------------|----------------------|-------|------|
| <b>Fermented dairy products</b> |                     |                      |                      |                      |       | 0.08 |
| low healthy diet score          | 1.00<br>(reference) | 0.69 (0.51,<br>0.94) | 0.70 (0.52,<br>0.93) | 0.67 (0.48,<br>0.93) | <0.01 |      |
| high healthy diet score         | 1.00<br>(reference) | 0.86 (0.61,<br>1.21) | 0.82 (0.59,<br>1.15) | 0.77 (0.53,<br>1.11) | 0.14  |      |

Abbreviations: BMI, body mass index; cirrhosis-GRS, cirrhosis-genetic risk score.

Adjusted for age, sex, BMI, total energy intake, diet score, smoking status, alcohol intake, educational level, Townsend deprivation index, physical activity, hypertension, diabetes, cancer, cardiovascular disease, cirrhosis-GRS, first 10 principal components of ancestry, and genotype measurement batch.

<sup>a</sup> Hazard ratio (95% confidence interval) obtained by using Cox proportional hazard model.

<sup>b</sup> Obtained by using the multivariable Cox proportional hazard model.



**Table S17. Comparison of included and excluded participants <sup>a</sup>**

| Characteristics                        | Excluded participants | Included participants | P value <sup>b</sup> |
|----------------------------------------|-----------------------|-----------------------|----------------------|
| No. of participants                    | 312,244               | 190,145               |                      |
| NAFLD genetic risk score               | 0.81 (0.54, 1.15)     | 0.81 (0.56, 1.15)     | 0.04                 |
| Cirrhosis genetic risk score           | 0.94 (0.74, 1.46)     | 1.00 (0.74, 1.46)     | 0.62                 |
| Age (years)                            | 58.0 (50.0, 64.0)     | 57.0 (50.0, 63.0)     | <0.0001              |
| Sex (male, %)                          | 44.8                  | 46.1                  | <0.0001              |
| BMI (kg/m <sup>2</sup> )               | 27.1 (24.4, 30.3)     | 26.2 (23.7, 29.2)     | <0.0001              |
| Townson depreitive index               | -1.93 (-3.54, 1.01)   | -2.41 (-3.78, -0.16)  | <0.0001              |
| Education level (college or higher, %) | 34.4                  | 46.6                  |                      |
| PA (MET × hour/week)                   | 29.9 (13, 62.5)       | 28.9 (13.7, 55.1)     | <0.0001              |
| Smoking status (%)                     |                       |                       | <0.0001              |
| Current smoker                         | 12.5                  | 7.55                  |                      |
| Ex-smoker                              | 33.8                  | 36.1                  |                      |
| Non-smoker                             | 53.8                  | 56.4                  |                      |
| Drinking status (%)                    |                       |                       | <0.0001              |
| Current drinker                        | 94.6                  | 90.3                  |                      |
| Ex-drinker                             | 2.80                  | 4.11                  |                      |
| Non-drinker                            | 2.57                  | 5.63                  |                      |
| Healthy diet score                     | 3.00 (3.00, 4.00)     | 4.00 (3.00, 4.00)     | <0.0001              |
| Individual history of disease (%)      |                       |                       |                      |
| Hypertension                           | 23.1                  | 27.9                  | <0.0001              |
| Diabetes                               | 5.07                  | 3.09                  | <0.0001              |
| Cardiovascular disease                 | 0.11                  | 1.52                  | <0.0001              |

---

|        |      |      |         |
|--------|------|------|---------|
| Cancer | 10.6 | 0.61 | <0.0001 |
|--------|------|------|---------|

---

BMI, body mass index; MET, metabolic equivalent; PA, physical activity.

<sup>a</sup> Continuous variables are expressed as medians (P25, P75) and categorical variables are expressed as percentages.

<sup>b</sup> P values are based on Wilcoxon signed-rank test or chi-square test.
